# Supplementary material for: The Web-Based Advance Care Planning Program “Explore Your Preferences for Treatment and Care”: Development, Pilot Study, and Before-and-After Evaluation
Source: PubMed Central journal article supplement (PMC9758635; doi:10.2196/38561), 2022-12-02
Supplement: jmir_v24i12e38561_app1.pdf [file jmir_v24i12e38561_app1.pdf]

Multimedia Appendix 1. Example screenshots of the web-based advance care planning program “Explore your preferences for treatment and care”. Link: <https://www.thuisarts.nl/keuzehulp/verken-uw-wensen-voor-zorg-en-behandeling>

### Home page:



The screenshot shows the home page of the 'Keuzehulp' website. At the top left is the 'Keuzehulp' logo, a cross made of four colored squares (green, yellow, blue, grey). To its right is the text 'Verken uw wensen voor zorg en behandeling'. Further right is a blue button labeled 'Start de keuzehulp'. Below the header are three utility buttons: 'Voorlezen' (with a speaker icon), 'Print' (with a printer icon), and 'E-mail' (with an envelope icon). The main content area features the heading 'Keuzehulp' in a small font, followed by a large, bold title 'Verken uw wensen voor zorg en behandeling'. Below the title is a paragraph explaining the tool's purpose: 'Deze keuzehulp helpt u met het nadenken over wensen voor zorg en behandeling, en het bespreken en vastleggen daarvan. U kunt hiermee beginnen als u nog gezond bent, maar ook wanneer u ouder wordt, of ziek wordt.' This is followed by another paragraph: 'Deze keuzehulp bestaat uit 3 stappen. Neem de tijd voor deze keuzehulp. De gegevens die u invult worden niet hier opgeslagen. U kunt wel aan het eind van de keuzehulp uw ingevulde gegevens downloaden en printen.' At the bottom of the text area are two buttons: a blue 'Start de keuzehulp' button and a grey 'Meer informatie' button. To the right of the text is a photograph of an elderly man in a brown jacket and cap talking to a younger man in a blue scarf.

## Step 1: Thinking about treatment and care preferences.

Information about what is important in life and thinking about preferences (+ video).

THUISARTS.NL  Zoeken

7% 1 2 3  × Sluiten

### Wat is voor u belangrijk?

Weten wat u belangrijk vindt in uw leven kan u helpen bij het nadenken over uw wensen voor toekomstige zorg en behandeling. Bijvoorbeeld dat u het belangrijk vindt om zonder pijn te leven. Of dat u graag zoveel mogelijk thuis behandeld wilt worden. Of dat het voor u belangrijk is om uw familie en vrienden dichtbij te hebben, of dat u kan genieten van de natuur.

Bekijk de video



[Download deze video](#) ▾

## Step 1: Thinking about treatment and care preferences.

Question: Which care would you like to receive or not?

19%

1 2 3

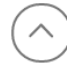

× Sluiten

Vraag

### Welke zorg wilt u wel of niet?

Bij voorkeur sluiten uw zorg en behandeling goed aan bij wat voor u belangrijk is. Het kan daarom helpen om te weten welke zorg en behandeling u wel of niet zou willen. Denk aan: ziekenhuiszorg, thuiszorg of mantelzorg. Maar ook aan: antibioticakuren, reanimatie, beademing en orgaantransplantaties.

Dit wil ik liever wel

Bijvoorbeeld ziekenhuiszorg

Dit wil ik liever niet

Bijvoorbeeld reanimatie

Volgende

## Step 2: Discussing your treatment and care preferences.

The healthcare representative (+ video).

THUISARTS.NL  Zoeken

44% 1 2 3  × Sluiten

### De zorgvertegenwoordiger

Een zorgvertegenwoordiger kan uw wensen en voorkeuren namens u vertellen wanneer u dat zelf niet meer kunt, bijvoorbeeld uw partner, familielid of vriend. Kies iemand van 18 jaar of ouder, en vraag of hij of zij deze rol op zich wil en kan nemen. Kies iemand die uw wensen duidelijk kan maken, ook wanneer hij of zij het niet daarmee eens is, en ook in moeilijke situaties. Bespreek ook wie eventueel uw zorgvertegenwoordiger kan vervangen. Vertel uw naasten en arts wie uw zorgvertegenwoordiger is. Hieronder kunt u een video bekijken over het aanwijzen van een zorgvertegenwoordiger.

[Ik wil meer uitleg](#)

Bekijk de video



## Step 2: Discussing your treatment and care preferences.

Question: What do you want to discuss with your doctor?

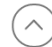

Vraag

### Wat zou u met uw arts willen bespreken?

Bijvoorbeeld mogelijkheden en wensen voor behandeling, uw gevoelens of angsten

Volgende

## Step 3: Recording your treatment and care preferences.

### How to make an advance directive (+ video).

THUISARTS.NL  Zoeken

81% 1 2 3 ^ × Sluiten

### Een wilsverklaring maken

Uw wensen voor toekomstige zorg en behandeling kunt u op papier vastleggen in een wilsverklaring. In een wilsverklaring kunnen uw naasten, uw zorgvertegenwoordiger en de behandelend arts zien wat uw wensen zijn, ook als u deze zelf niet kunt aangeven. Een wilsverklaring kan niet garanderen dat u de zorg krijgt die u wilt. Een wilsverklaring kan wel uw zorgvertegenwoordiger en arts helpen om zorgbeslissingen te maken. Bekijk de video over het schrijven van een wilsverklaring.

[Ik wil meer uitleg](#)

[Bekijk de video](#)



[Download deze video](#) ▾

### Step 3: Recording your treatment and care preferences.

Question: When would you review your advance directive?

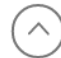

Vraag

**Wanneer controleert u uw wilsverklaring?**

leder jaar

ledere 5 jaar

Alleen wanneer mijn gezondheid slechter wordt

## End of program

Your answers as given while completing this program (with the possibility to print the answers or save in PDF).

### Keuzehulp

## Alstublieft, uw antwoorden bij deze keuzehulp

Deze antwoorden kunnen u helpen tijdens gesprekken met uw naasten en arts, en bij het opstellen van een wilsverklaring. Als uw wensen veranderen of als u uw document wilt aanpassen, kunt u de keuzehulp opnieuw invullen: de antwoorden worden niet opgeslagen.

Print antwoorden

Bekijk antwoorden
